# Supplementary material
Source: PubMed Central journal article supplement (PMC6805083)
Supplement: AEM.01189-19-s0001.pdf [file AEM.01189-19-s0001.pdf]

Supplementary data

**Fig. S1 Mechanical disruption of *T. gondii* oocysts for releasing sporocysts by TissueLyser.** Oocysts were mixed with different types (ceramic, glass) and sizes of beads (1.4 mm in ceramic, 425-600  $\mu$ m or 2 mm in glass, or using a Lysing Matrix E tube (MP Biomedicals)) and submitted to TissueLyser agitation at 33 Hz for 30 sec, 1 min, 2 min, 3 min or 5 min to release sporocysts. \* no observed sporocysts. The y axis indicates mean percentage  $\pm$  standard deviation of sporocysts released by microscopic count and the corresponding standard deviation. Number of experiments varied between 1 and 7. When no standard deviation: n=1.

**Table S1. Effects of heat treatments on the infectivity of *T. gondii* oocysts assessed by sporocyst-CC-qPCR and bioassay.** n=3 independent experiments; <sup>a</sup> -, no detection of tachyzoites in Vero cell culture; +, detection of tachyzoites in Vero cell culture; <sup>b</sup> -, no seroconversion of mice; +, mice seroconversion.

Figure S1

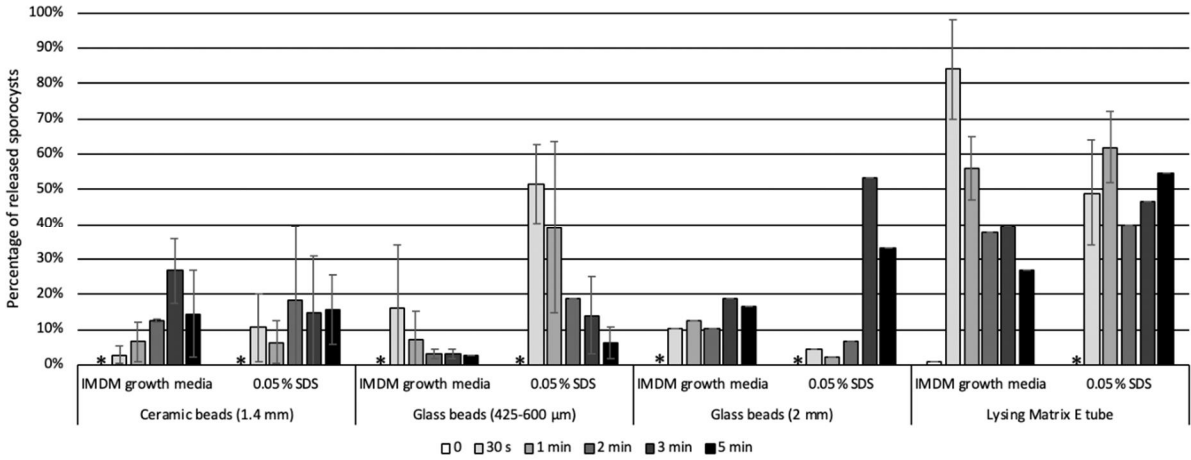

Table S1

| Treatment  | qCC-PCR <sup>a</sup> | Bioassay <sup>b</sup> |
|------------|----------------------|-----------------------|
| Untreated  | +                    | +                     |
| 5 min 99°C | -                    | -                     |
| 2 min 80°C | -                    | -                     |
| 2 min 60°C | -                    | -                     |
